# Supplementary material
Source: Springer Nature journal article supplement (https://www.springermedizin.de/resource/supplementary/12885_2012_3887_MOESM5_ESM.pdf/9464700)
Supplement: MOESM5 [file 9464700]

| <b>Table 1. BASELINE PATIENT CHARACTERISTICS</b> |                            |                  |                       |
|--------------------------------------------------|----------------------------|------------------|-----------------------|
| <b>N= 180</b>                                    |                            | <b>Mean ± SD</b> | <b>Patients n (%)</b> |
| <b>Age (years)</b>                               |                            | 59.4±12.2        |                       |
| <b>Gender</b>                                    | Women                      |                  | 82 (45.6)             |
|                                                  | Men                        |                  | 98 (54.4)             |
| <b>Smoking History</b>                           | Positive                   |                  | 103 (57.3)            |
|                                                  | Negative                   |                  | 77 (42.7)             |
| <b>Wood-smoke exposure</b>                       | Positive                   |                  | 73 (40.6)             |
|                                                  | Negative                   |                  | 103 (59.4)            |
| <b>ECOG</b>                                      | 0                          |                  | 38 (21.1)             |
|                                                  | 1                          |                  | 115 (63.9)            |
|                                                  | 2                          |                  | 26 (14.4)             |
|                                                  | 3                          |                  | 1 (0.6)               |
| <b>Clinical Stage</b>                            | III                        |                  | 28 (15.6)             |
|                                                  | IV                         |                  | 152 (84.4)            |
| <b>Histology</b>                                 | Adenocarcinoma             |                  | 152 (84.4)            |
|                                                  | Squamous-cell              |                  | 14 (7.8)              |
|                                                  | Undifferentiated           |                  | 13 (7.2)              |
|                                                  | Large-cell carcinoma       |                  | 1 (0.6)               |
| <b>Baseline CEA</b>                              |                            | 242.8 ± 685      |                       |
| <b>Treatment</b>                                 | Platinum-Based CT          |                  | 168 (93.3)            |
|                                                  | Tyrosine-kinase inhibitors |                  | 12 (6.7)              |
| <b>Tumor Response Evaluation</b>                 | Complete/Partial           |                  | 51 (28.3)             |
|                                                  | Stable Disease             |                  | 89 (49.4)             |
|                                                  | Progressive Disease        |                  | 40 (22.2)             |

**Abbreviations:** SD, standard deviation; CEA, carcinoembryonic antigen; CT, chemotherapy
